# Supplementary material for: The impact of COVID-19 vaccines on patients with immune thrombocytopenic purpura: A protocol for a systematic review and meta-analysis
Source: bioRxiv or medRxiv preprint supplement (doi:10.1101/2023.12.09.23298879), 2023-12-13
Supplement: Supplementary file [file media-1.pdf]

## Search strategy

### MEDLINE:

#1 Search related to "immune thrombocytopenic purpura":

((("Idiopathic Thrombocytopenic Purpura"[Mesh]) OR ("Thrombocytopenic Purpura, Idiopathic"[tiab]) OR ("Immune Thrombocytopenic Purpura"[Mesh]) OR ("ITP"[tiab]) OR ("Immune Thrombocytopenia"[tiab]))

#2 Search related to "COVID-19 Vaccines":

((("COVID-19 Vaccines"[Mesh]) OR ("Vaccines"[Mesh]) OR ("Vaccination"[Mesh]) OR ("Vaccin\*"[tiab]) OR ("sars-cov-2 vaccine"[tiab]))

#3 Search related to "randomized controlled trial":

((("Randomized Controlled Trial"[Publication Type]) OR ("Controlled Clinical Trial"[Publication Type]) OR ("Random Allocation"[Mesh]) OR ("Prospective Studies"[Mesh]) OR ("Clinical Trial"[Publication Type]))

#4 #1 AND #2 AND #3

### PubMed:

#1 Search related to "immune thrombocytopenic purpura":

((("Idiopathic Thrombocytopenic Purpura"[Mesh]) OR ("Thrombocytopenic Purpura, Idiopathic"[tiab]) OR ("Immune Thrombocytopenic Purpura"[Mesh]) OR ("ITP"[tiab]) OR ("Immune Thrombocytopenia"[tiab]))

#2 Search related to "COVID-19 Vaccines":

((("COVID-19 Vaccines"[Mesh]) OR ("Vaccines"[Mesh]) OR ("Vaccination"[Mesh]) OR ("Vaccin\*"[tiab]) OR ("sars-cov-2 vaccine"[tiab]))

#3 Search related to "randomized controlled trial":

((("Randomized Controlled Trial"[Publication Type]) OR ("Controlled Clinical Trial"[Publication Type]) OR ("Random Allocation"[Mesh]) OR ("Prospective Studies"[Mesh]) OR ("Clinical Trial"[Publication Type]))

#4 #1 AND #2 AND #3

### EMBASE:

#1 Search related to "immune thrombocytopenic purpura":

( ' idiopathic thrombocytopenic purpura ' /exp OR ' immune thrombocytopenic purpura ' /exp OR ' ITP ' OR ' immune thrombocytopenia ' )

#2 Search related to "COVID-19 Vaccines":

( ' COVID-19 Vaccines ' /exp OR ' Vaccines ' /exp OR ' Vaccination ' /exp OR ' Vaccin\* OR ' sars-cov-2 vaccine ' )

#3 Search related to "randomized controlled trial":

( ' randomized controlled trial ' /exp OR ' controlled clinical trial ' /exp OR ' random allocation ' /exp OR ' prospective study ' /exp OR ' clinical trial ' /exp)

#4 #1 AND #2 AND #3

### Cochrane Library:

#1 Search related to "immune thrombocytopenic purpura":

("idiopathic thrombocytopenic purpura" OR "immune thrombocytopenic purpura" OR

"ITP" OR "immune thrombocytopenia")

#2 Search related to "COVID-19 Vaccines":

("COVID-19 Vaccines" OR "Vaccines" OR "Vaccination" OR "Vaccin\*" OR "sars-cov-2 vaccine")

#3 Search related to "randomized controlled trial":

("randomized controlled trial" OR "controlled trial" OR "random allocation" OR "prospective study" OR "clinical trial")

#4 #1 AND #2 AND #3

#### **VIP:**

(M=新型冠状病毒肺炎 OR COVID-19 OR 新冠肺炎 OR 冠状病毒病 OR 2019 冠状病毒病 OR 冠状病毒肺炎 OR 病毒性肺炎 OR 新冠 OR 新型冠状病毒 OR 2019-nCoV OR SARS-CoV-2 OR 2019新型冠状病毒 OR 严重急性呼吸道综合征冠状病毒 2 型 OR 新冠病毒 OR 冠状病毒) AND (U=免疫性血小板减少症 OR 特发性血小板减少性紫癜) AND (R=随机 OR 随机对照 OR RCT)

#### **CNKI:**

TI=(新型冠状病毒肺炎+COVID-19+新冠肺炎+冠状病毒病+2019 冠状病毒病+冠状病毒肺炎+病毒性肺炎+新冠+新型冠状病毒+2019-nCoV+SARS-CoV-2+2019新型冠状病毒+严重急性呼吸道综合征冠状病毒 2 型+新冠病毒+冠状病毒) AND SU=(免疫性血小板减少症+特发性血小板减少性紫癜) AND AB=(随机 OR 随机对照 OR RCT)

#### **CBM:**

("新型冠状病毒肺炎"[常用字段] OR "COVID-19"[常用字段] OR "新冠肺炎"[常用字段]) OR "冠状病毒病"[常用字段] OR "2019 冠状病毒病"[常用字段] OR "冠状病毒肺炎"[常用字段] OR "病毒性肺炎"[常用字段] OR "新冠"[常用字段] OR "新型冠状病毒"[常用字段] OR "2019-nCoV"[常用字段] OR "SARS-CoV-2"[常用字段] OR "2019 新型冠状病毒"[常用字段] OR "严重急性呼吸道综合征冠状病毒 2 型"[常用字段] "新冠病毒"[常用字段] OR "冠状病毒"[常用字段]) AND ("免疫性血小板减少症"[常用字段] OR "特发性血小板减少性紫癜"[常用字段]) AND "随机对照试验"[文献类型]

#### **Wan Fang:**

(题名或关键词=新型冠状病毒肺炎 OR COVID-19 OR 新冠肺炎 OR 冠状病毒病 OR 2019 冠状病毒病 OR 冠状病毒肺炎 OR 病毒性肺炎 OR 新冠 OR 新型冠状病毒 OR 2019-nCoV OR SARS-CoV-2 OR 2019新型冠状病毒 OR 严重急性呼吸道综合征冠状病毒 2 型 OR 新冠病毒 OR 冠状病毒) AND (主题=免疫性血小板减少症 OR 特发性血小板减少性紫癜) AND (摘要=随机 OR 随机对照 OR RCT)
